# Supplementary material for: Cell mixing at a neural crest-mesoderm boundary and deficient ephrin-Eph signaling in the pathogenesis of craniosynostosis
Source: Oxford University Press journal article supplement (doi:10.1093/hmg/ddl052), 2006-03-15
Supplement: ddl052_Supplementary_Data.zip [file ddl052_Supplementary_Data.zip]

Archive with 4 entries (4 files):
- Supplementary_Fig1_hmg.pdf
- ddl052_supp_fig.doc
- ddl052_Supp_Tabl.doc
- ddl052_SuppMat_Methods.doc
