# Supplementary material for: Cell mixing at a neural crest-mesoderm boundary and deficient ephrin-Eph signaling in the pathogenesis of craniosynostosis
Source: Oxford University Press journal article supplement (doi:10.1093/hmg/ddl052), 2006-03-15
Supplement: ddl052_Supplementary_Data.zip [file ddl052_Supplementary_Data.zip › Supplementary_Fig1_hmg.pdf]

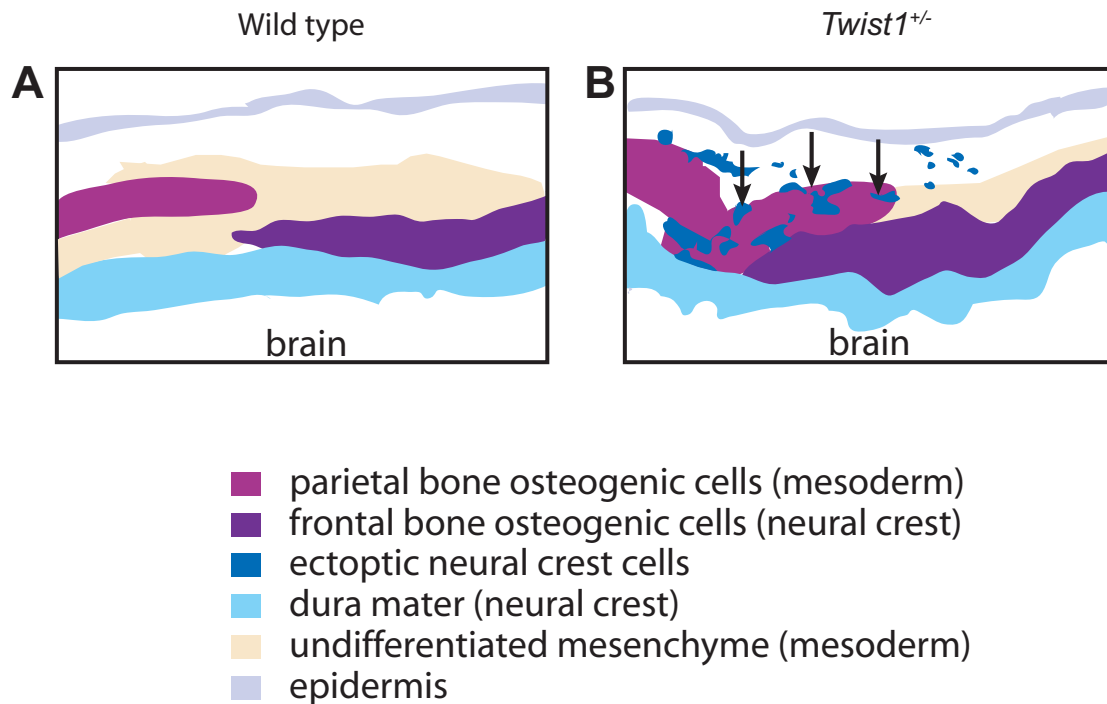

**Supplementary Figure 1.** Diagrammatic representation of the developing coronal suture at E14.5. (A) In wild type embryos, the neural crest-derived frontal bone and the mesoderm-derived parietal bone are distinct and separated by undifferentiated mesenchyme. (B) In *Twist1*<sup>+/-</sup> mutant embryos, neural crest-derived cells are located ectopically in the presumptive parietal bone compartment and the undifferentiated mid-suture mesenchyme is absent.
